# Supplementary material
Source: publisher site journal article supplement (https://www.dovepress.com/article/584872)
Supplement: Supplementary file 1 [file 584872%20Revised%20Supplementary%20Materials.pdf]

# Supplementary Information

Fig. S1 Pathways associated with RHO/ROCK activation

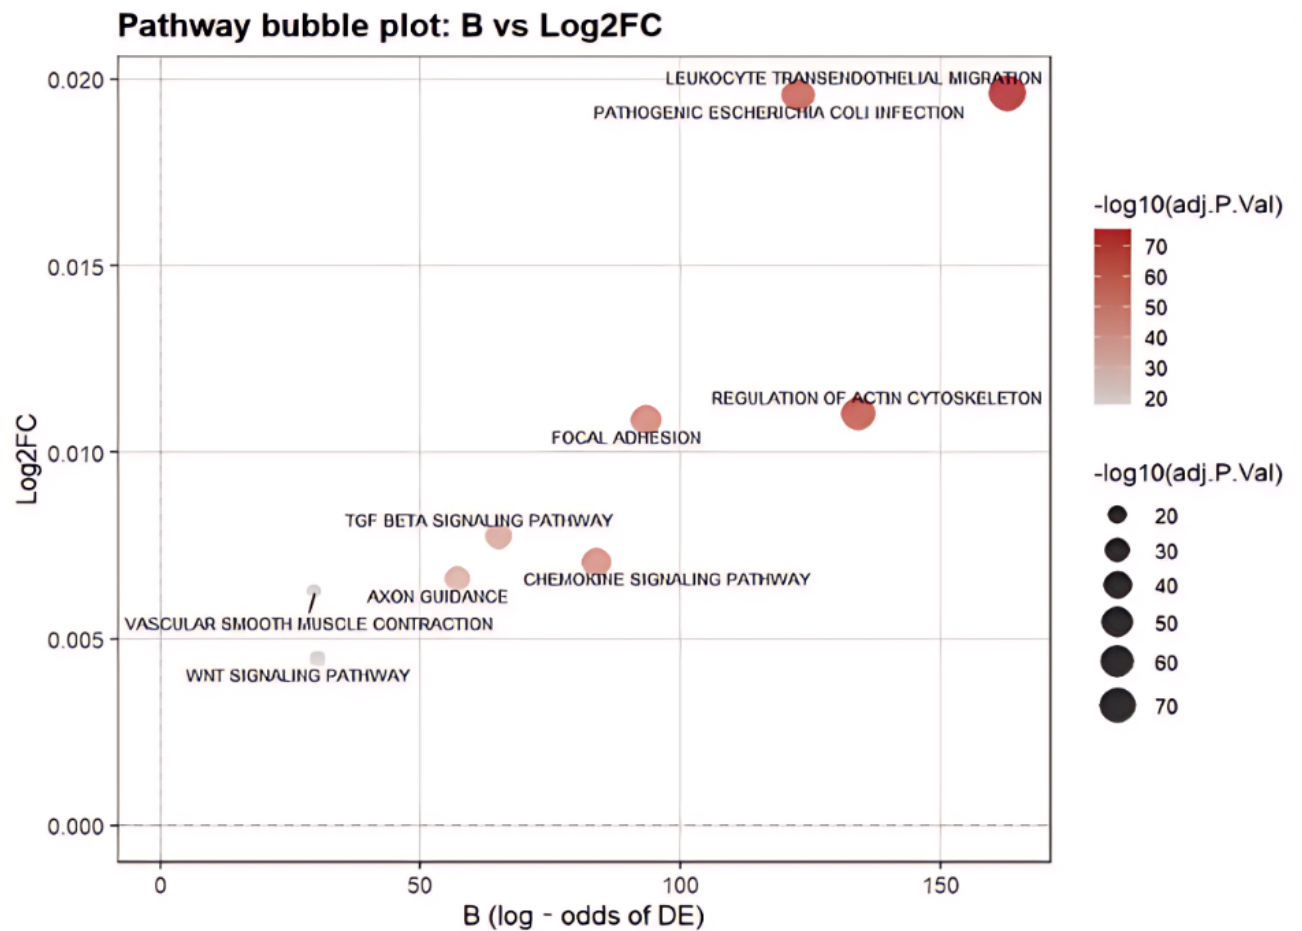

**Fig. S1.** Unbiased pathway analysis connects RHO/ROCK activation to processes including leukocyte transendothelial migration, actin cytoskeleton reorganization, and focal adhesion.

**Fig. S2 GSEA enrichment of angiogenesis regulation**

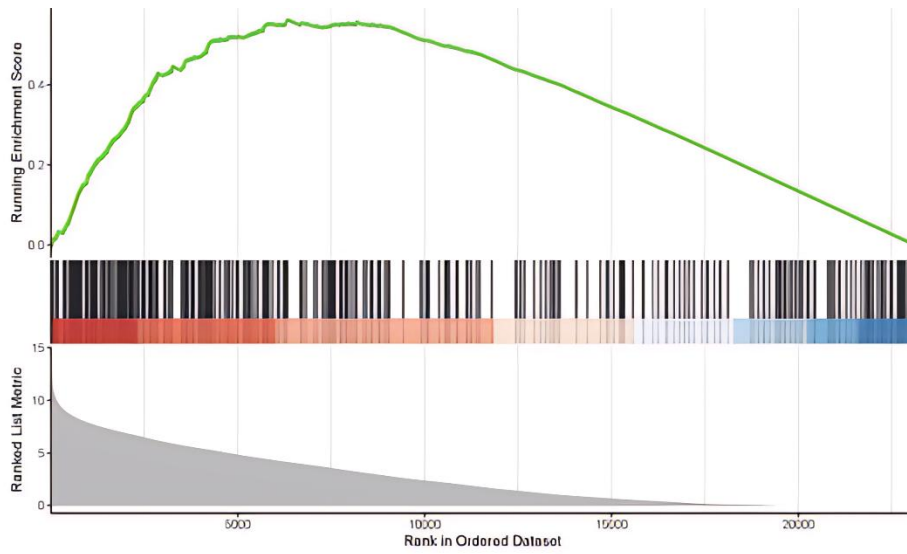

**Fig. S2.** Gene Set Enrichment Analysis (GSEA) shows significant enrichment of the ‘regulation of angiogenesis’ gene set. GO:0045765: regulation of angiogenesis.

**Fig. S3 GSEA enrichment of endothelial cell migration**

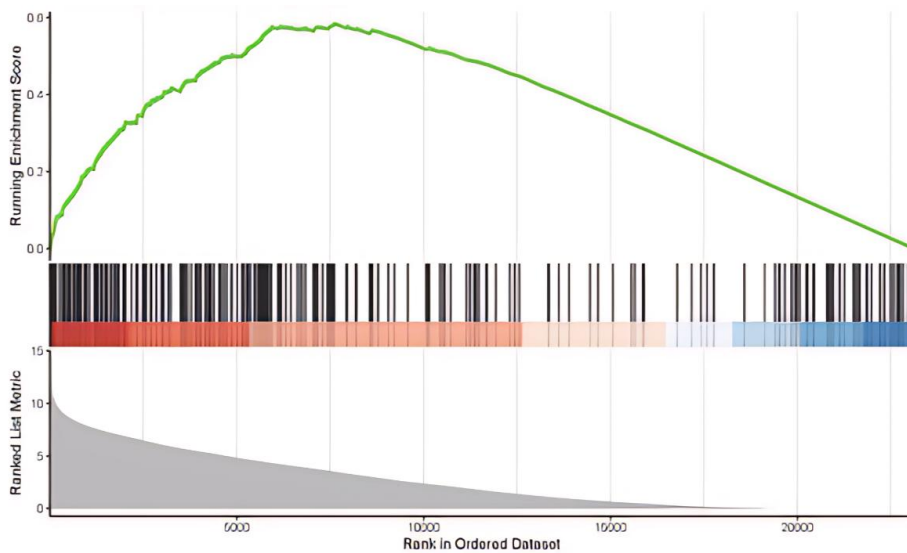

**Fig. S3.** Gene Set Enrichment Analysis (GSEA) shows significant enrichment of the ‘endothelial cell migration’ gene set. GO:0043542: endothelial cell migration.

**Fig. S4 SEM morphology of Fasudil@PDA nanoparticles**

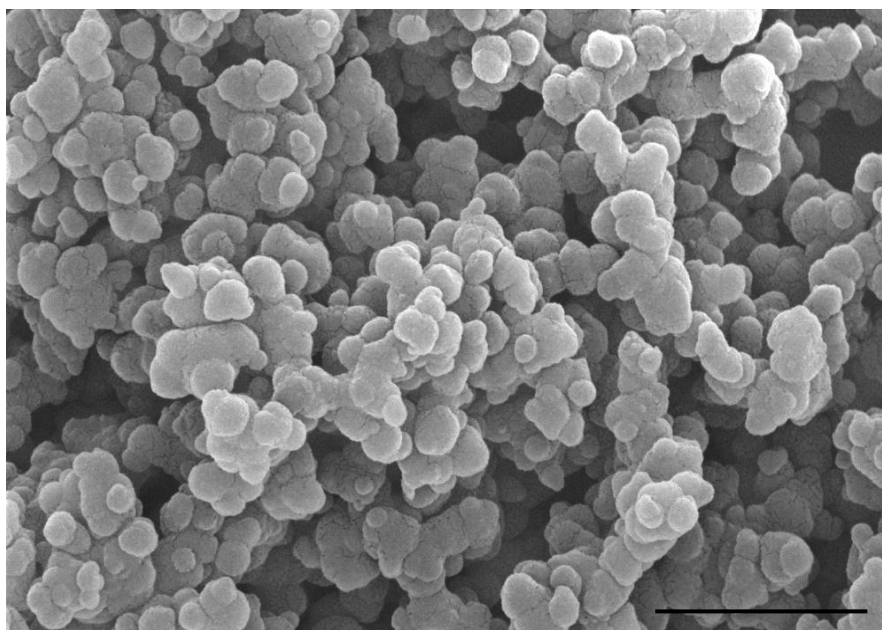

**Fig. S4.** Scanning electron microscopy (SEM) image of the surface morphology of Fasudil@PDA nanoparticles. Scale bar, 1 μm.

**Fig. S5 Elemental mapping (C, N, O, S) of a single Fasudil@PDA**

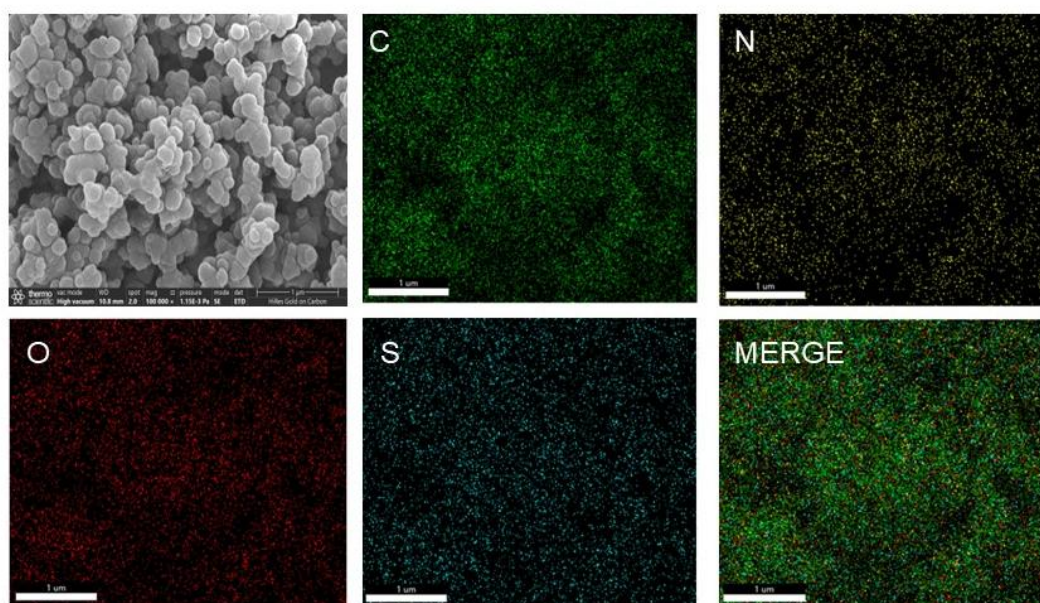

**Fig. S5.** Elemental mapping (C, N, O, S) of a single Fasudil@PDA obtained by energy-dispersive X-ray spectroscopy (EDS) in a scanning electron microscope (SEM). Scale bar, 1 μm.

**Fig. S6 C1s XPS spectra of Fasudil, PDA, and Fasudil@PDA**

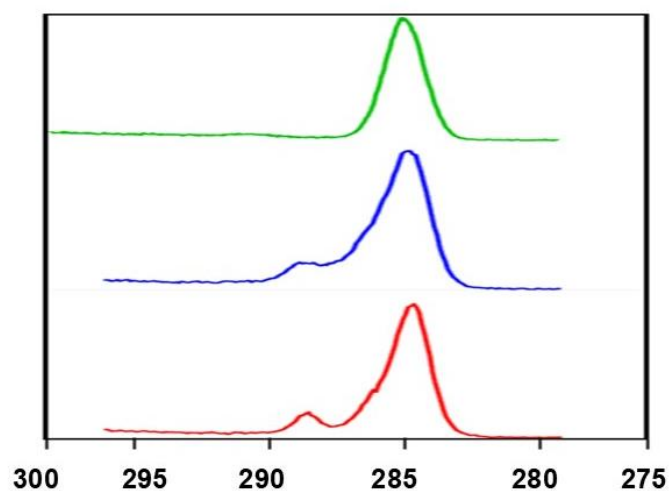

**Fig. S6.** High-resolution C1s XPS spectra of Fasudil (green), PDA (blue), and Fasudil@PDA (red). The spectra reveal the distinct chemical states of carbon in each sample, illustrating successful composite formation through characteristic binding energy shifts and peak profile changes.

**Fig. S7 MS spectra of standard Fasudil and released Fasudil.**

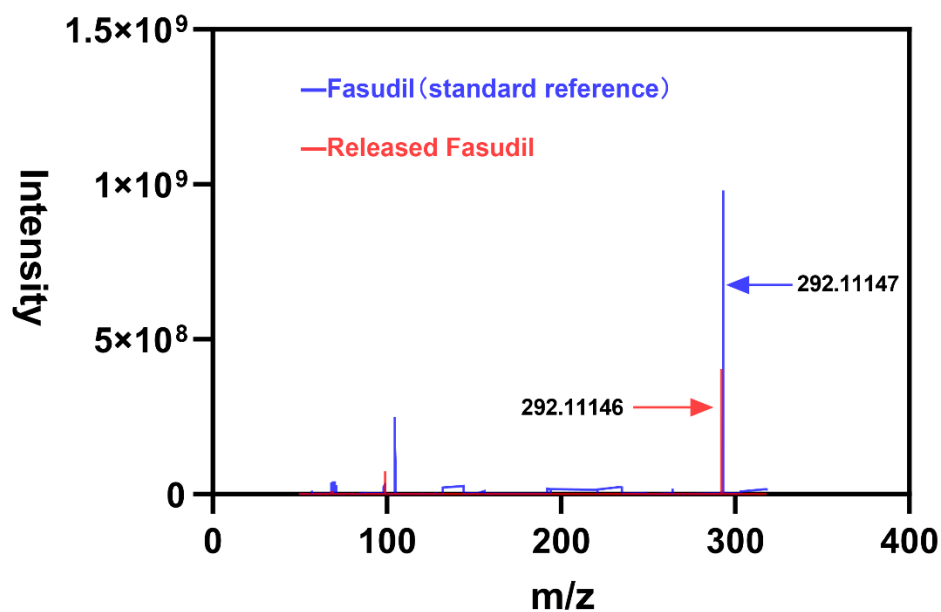

**Fig. S7.** MS spectra of standard Fasudil and released Fasudil. The peak at \*m/z\* 292.11 confirms the identity of the released drug.

**Fig. S8** Size change of nanoparticles after H<sub>2</sub>O<sub>2</sub> incubation

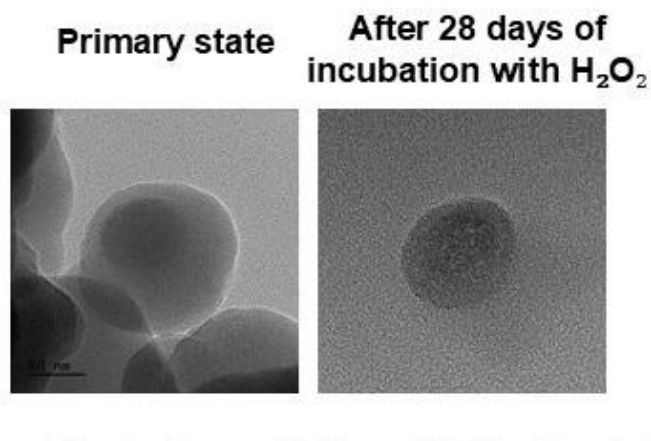

**Fig. S8.** Size change of nanoparticles after H<sub>2</sub>O<sub>2</sub> incubation. Comparison of the primary state and after 28-day treatment with H<sub>2</sub>O<sub>2</sub>. Scale bar, 50 nm.

**Fig. S9** EDS elemental mapping of Fasudil@PDA after H<sub>2</sub>O<sub>2</sub> treatment.

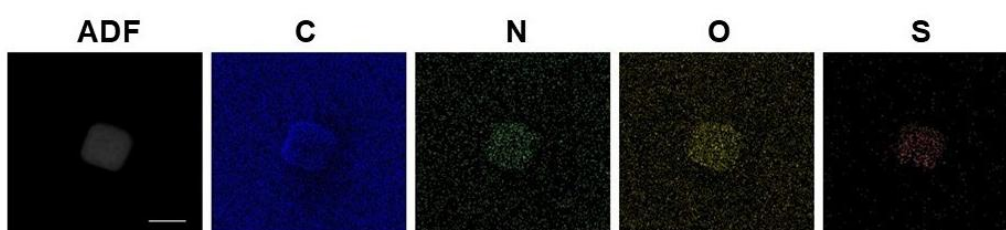

**Fig. S9.** EDS elemental mapping of Fasudil@PDA after H<sub>2</sub>O<sub>2</sub> treatment. Elemental maps (C, N, O, S) of a nanoparticle incubated with H<sub>2</sub>O<sub>2</sub> for 28 days, demonstrating maintained structural composition and successful drug retention (evidenced by S signal). Scale bar, 100 nm.

**Fig. S10** *In vitro* tube formation assay

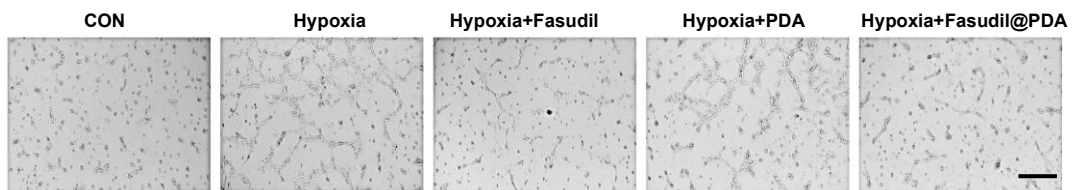

**Fig. S10.** *In vitro* tube formation assay under hypoxic conditions. Scale bar, 100  $\mu\text{m}$ .

**Fig. S11** BEND.3 cell viability after Fasudil@PDA treatment

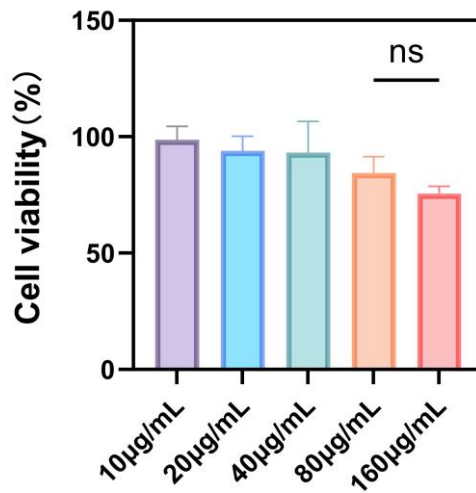

**Fig. S11.** Cell viability of BEND.3 cells after 24 h incubation with various concentrations of Fasudil@PDA NPs, as determined by the CCK-8 assay. ns denotes no significant difference ( $p \geq 0.05$ ).

**Fig. S12 BEND.3 cell viability after PDA treatment**

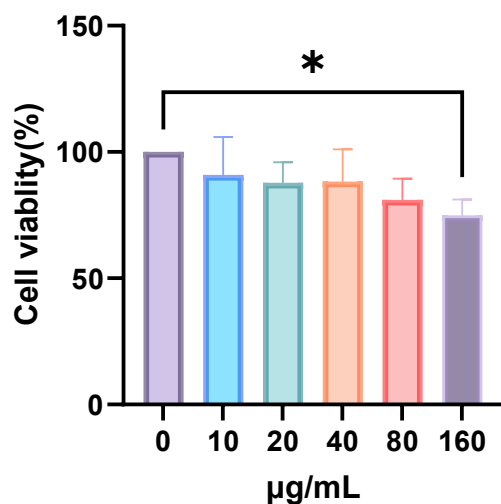

**Fig. S12.** Cell viability of BEND.3 cells after 24 h incubation with various concentrations of PDA, as determined by the CCK-8 assay. Data are presented as mean  $\pm$  SD; \* $p < 0.05$ .

**Fig. S13 BEND.3 cell viability after Fasudil treatment**

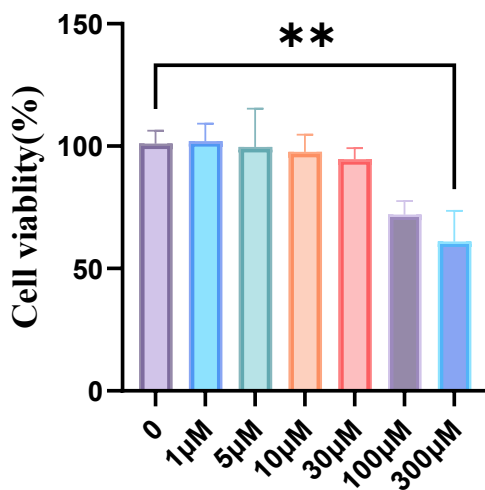

**Fig. S13.** Cell viability of BEND.3 cells after 24 h incubation with various concentrations of Fasudil, as determined by the CCK-8 assay. Data are presented as mean  $\pm$  SD; \*\* $p < 0.01$ .

**Fig. S14 Fluorescence images of Fasudil@PDA-CY5 nanoparticle uptake in retinal sections**

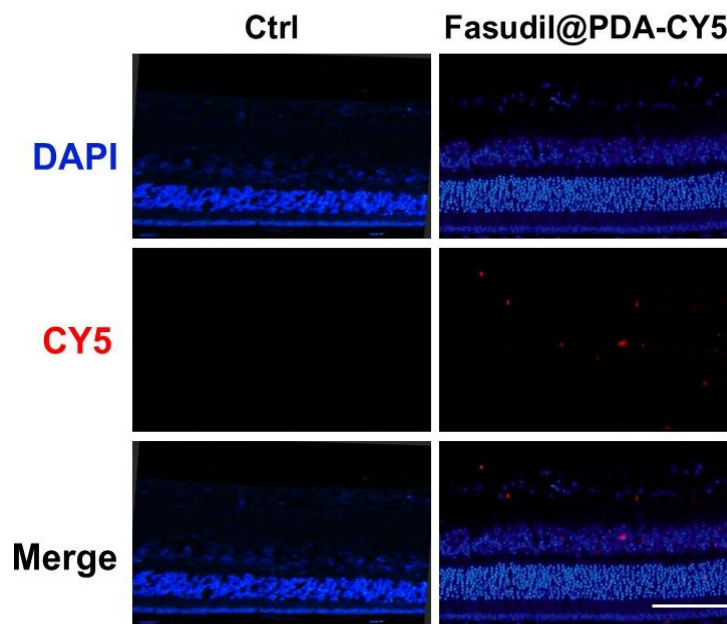

**Fig.S14.** Representative fluorescence images showing the **tissue uptake** of Fasudil@PDA-CY5 nanoparticles in retinal sections. Nuclei are stained with DAPI (blue), and the nanoparticles are labeled with CY5 (red). The merged image reveals the distribution and efficient accumulation of nanoparticles within the retinal tissue. Scale bar: 100  $\mu\text{m}$ .

**Fig. S15 H&E staining of retinal sections for Fasudil@PDA NPs histocompatibility**

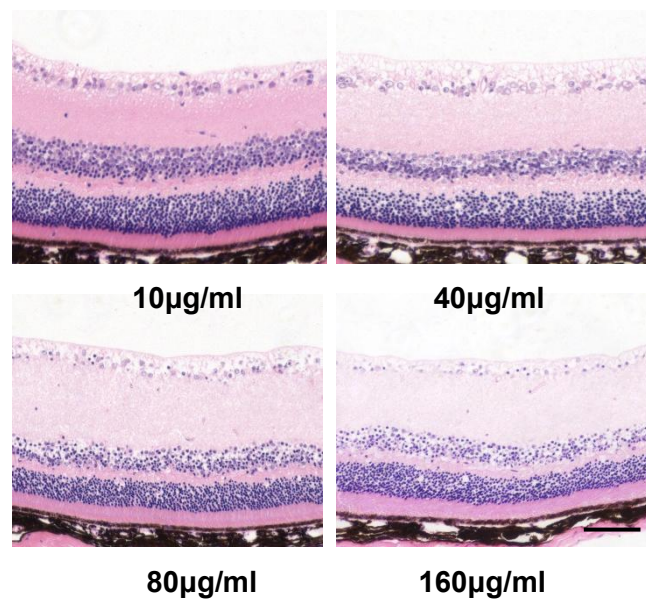

**Fig.S15.** Histocompatibility of Fasudil@PDA NPs after intravitreal administration. H&E staining of retinal sections following a two-month post-injection period at doses of 10, 40, 80, and 160 µg/ml. Scale bar, 50 µm.

**Fig. S16 Quantitative analysis of retinal thickness after Fasudil@PDA NP administration**

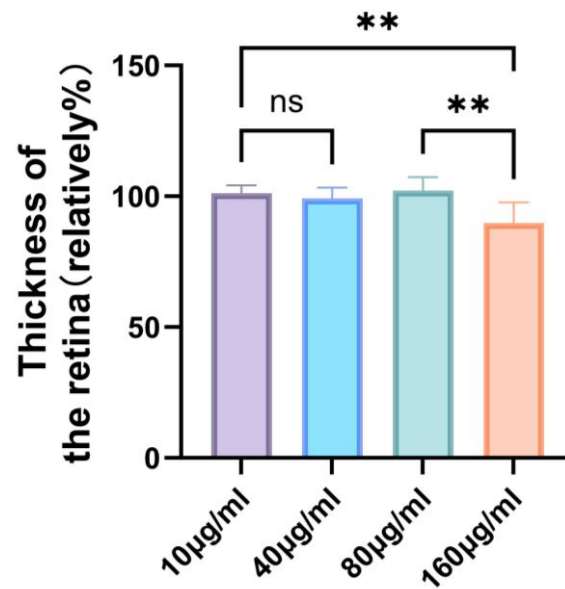

**Fig. S16.** Quantitative analysis of retinal thickness. Relative retinal thickness after intravitreal administration of Fasudil@PDA NPs at varying concentrations (40, 80, and 160 µg/ml). Data presented as mean ± SD. \*\* $p < 0.01$  vs. control; ns denotes no significant difference ( $p \geq 0.05$ ).
